# Supplementary material
Source: PubMed Central journal article supplement (PMC4052366)
Supplement: NIHMS594556-supplement-1.pdf [file NIHMS594556-supplement-1.pdf]

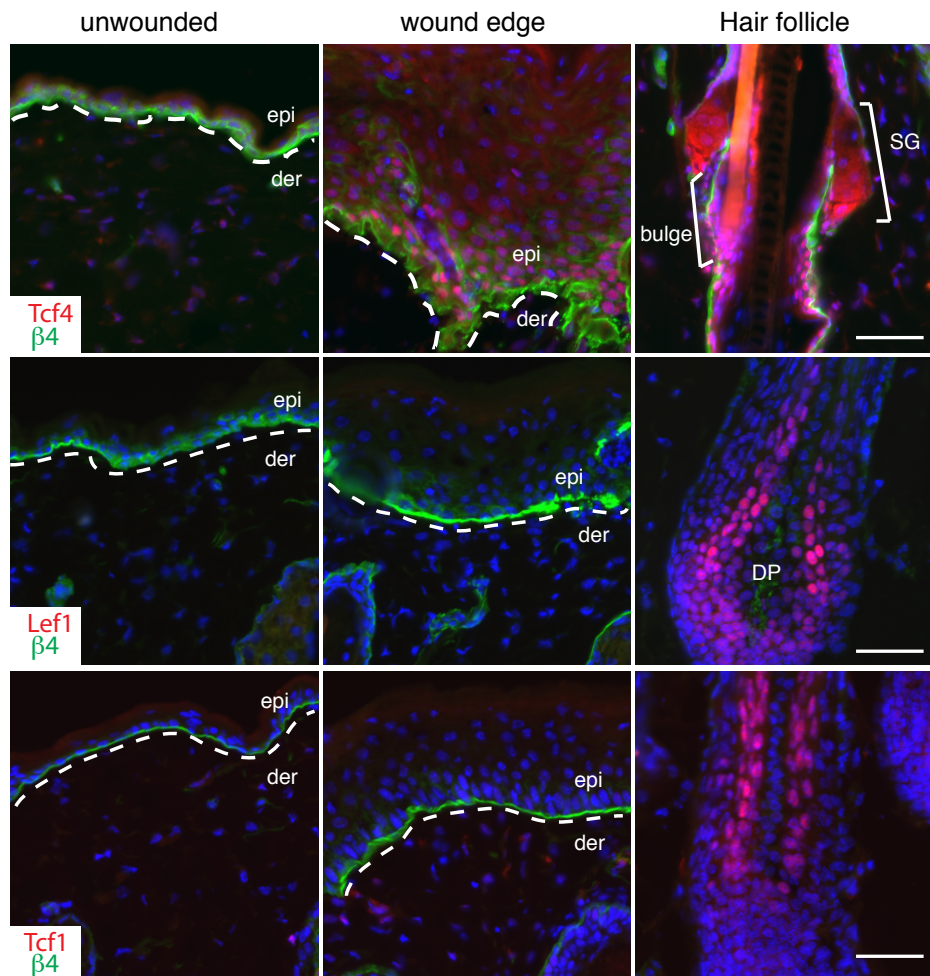

**Supplementary Figure 1. Tcf4 is also induced at the skin wound edge.**

Images of immunofluorescence analysis of wounded and unwounded skins with hair follicles as positive control. Full thickness wounds were created on dorsal skins of 10-week old mice and isolated 5 days post wounding. Skins containing the wound sites were embedded in OCT, sectioned and analyzed by immunofluorescence with antibodies against Tcf4, Lef1, Tcf1 and integrin  $\beta 4$  (color coding according to the secondary abs). Unwounded skins from the same mice were used as unwounded controls and hair follicles were used as positive controls. Bar denotes 50 $\mu$ m.

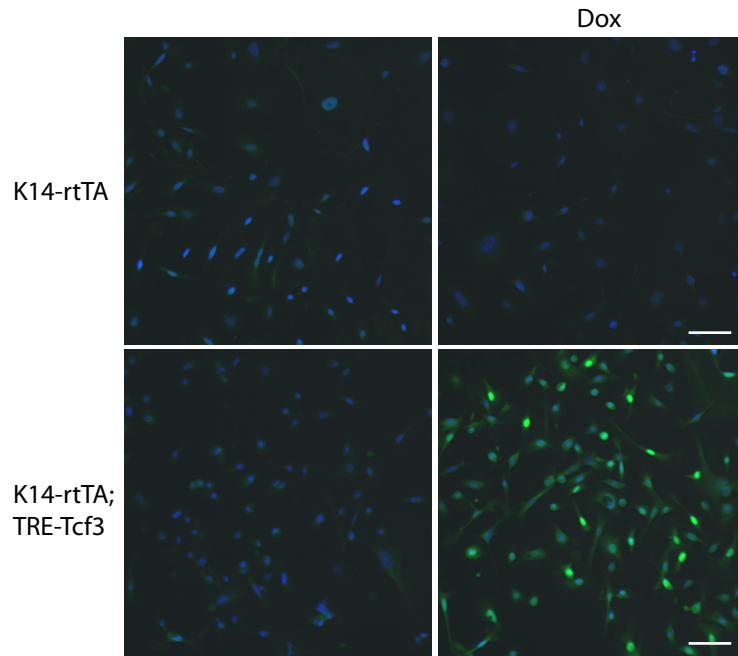

**Supplementary Figure 2. Keratinocytes isolated from *K14rtTA;TRE-Tcf3* skin express tet-inducible Tcf3.**

Immunofluorescence images of keratinocytes expressing tet-inducible myc-tagged Tcf3. Keratinocytes were isolated from tet-inducible Tcf3 (*K14rtTA;TRE-mycTcf3*) or control (*K14-rtTA*) mice. Cells were grown in media containing doxycycline (Dox) or vehicle control for 24 hours prior to being fixed and immunostained for myc-tagged Tcf3 (green). Bar denotes 20 $\mu$ m.

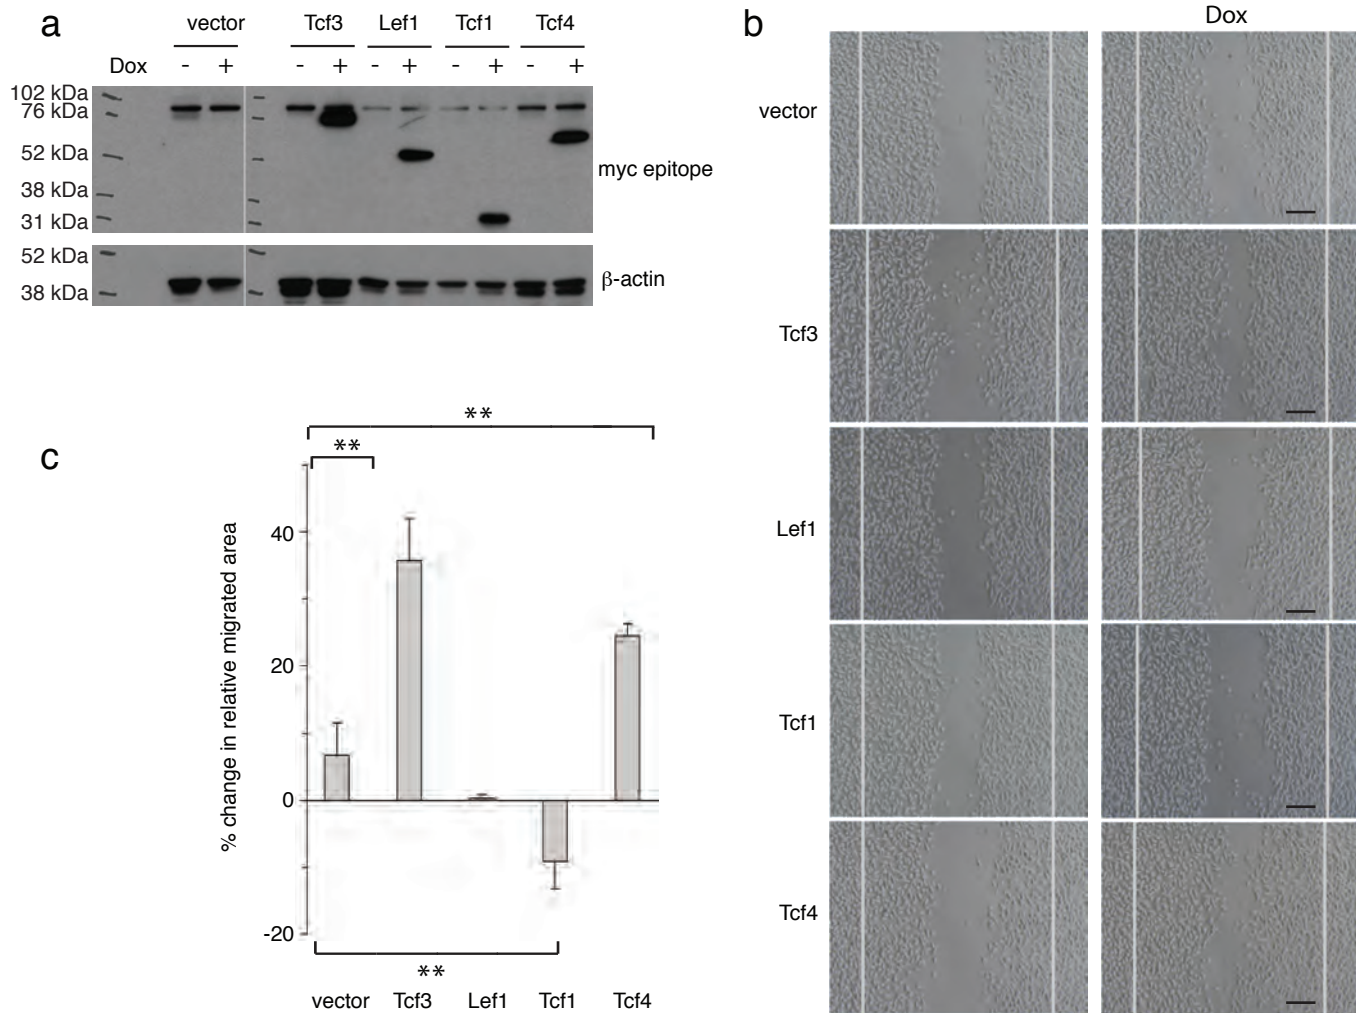

**Supplementary Figure 3. Tcf3 and Tcf4 are the only Lef/Tcf members that promote cell migration.**

(a) Keratinocytes were transduced with GFP-tagged lentiviral vectors expressing tet-inducible myc-tagged Lef/Tcfs. After the transduced cells were enriched by fluorescent cell sorting, they were treated with Dox or vehicle control for 24 hours and harvested at the initiation of the migration assay. Western blot analysis was performed with antibodies against myc-epitope tag and  $\beta$ -actin.

(b) Keratinocytes were transduced to express tet-inducible Tcf3, Tcf4, Lef1, or Tcf1 and then subjected to the migration assay with or without Dox. Images were taken 16 hrs after the initiation of the migration assay. Black bar denotes 200 $\mu$ m.

(c) Graph quantifying the area migrated by transduced cells treated with Dox relative to the area migrated by cells treated with vehicle control. Data are mean  $\pm$  s.d. \*\* $p < 0.001$  (Student's *t* test).

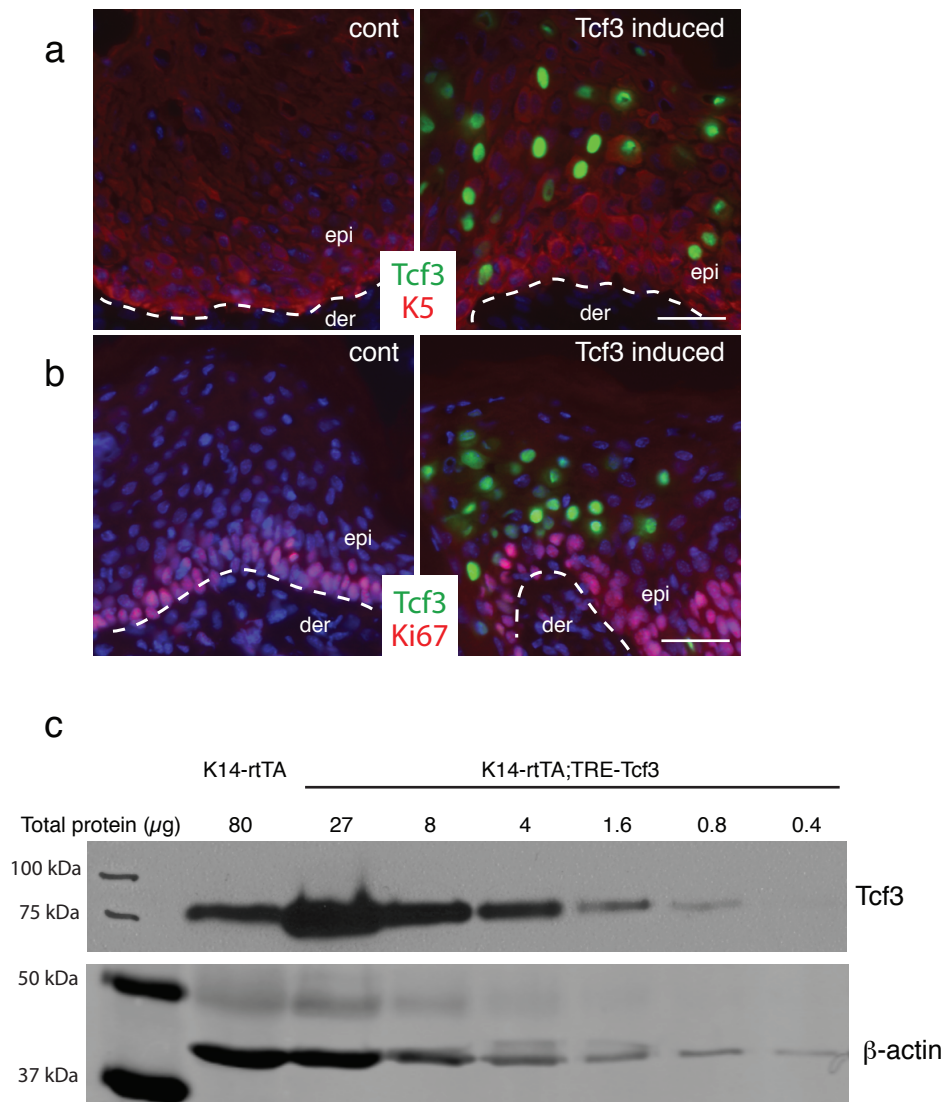

**Supplementary Figure 4. Tcf3 is overexpressed in skins of tet-induced Tcf3 mice.**

(a-b) Immunofluorescence images of skins of tet-inducible Tcf3 (*K14-rtTA;TRE-mycTcf3*) or control (*K14-rtTA* or *TRE-mycTcf3*) mice that had been maintained on a doxycycline containing diet. 6 days post wounding, skins were embedded in OCT and immunostained with antibodies specific to Tcf3 (green) and integrin  $\beta$ 4 (red) or Ki67 (red). Bar denotes 20 $\mu$ m.

(c) Western analysis of total proteins isolated at the wound edge of control (*K14-rtTA*) or Tcf3 induced (*K14-rtTA;TRE-Tcf3*) skins 5 days post wounding. Tcf3 and  $\beta$ -actin were probed with HRP- or fluorescence-labeled secondary antibody, respectively.





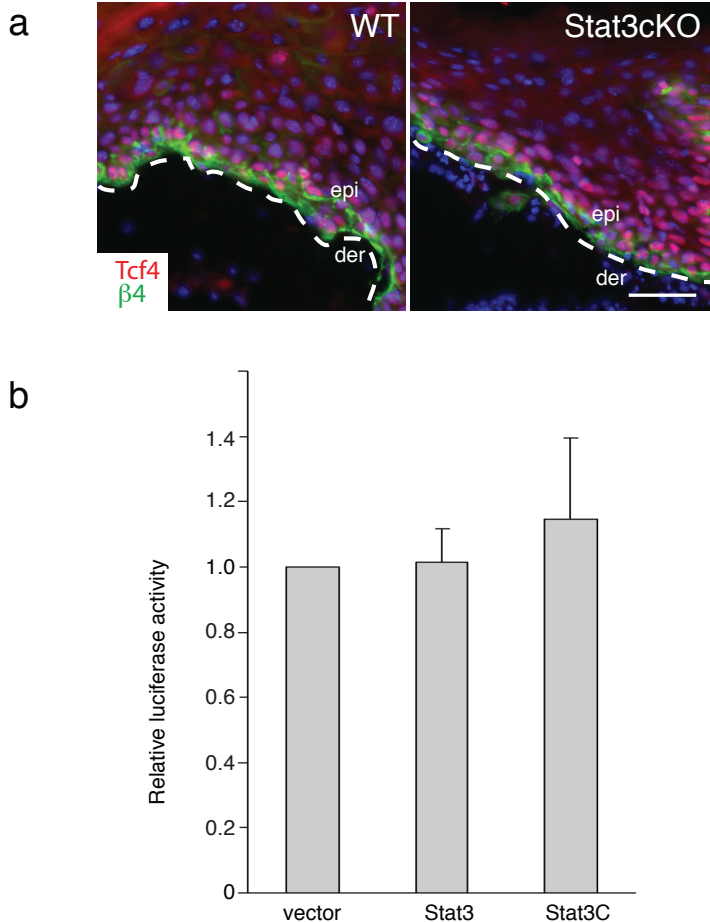

**Supplementary Figure 6. Tcf4 induction at the wound edge is independent of Stat3.**

(a) Ablation of Stat3 does not affect Tcf4 induction at the wound edge. Images of immunofluorescence analysis of the wound edge of skin from *Stat3<sup>fl/fl</sup>;K14-Cre* (*Stat3* cKO) and *Stat3<sup>fl/fl</sup>* (WT) mice. Full-thickness wounds were created on dorsal skins of 10-week old mice and isolated 5 days post wounding. Skins containing the wound sites were embedded in OCT, sectioned and analyzed by immunofluorescence with antibodies against phospho-Tcf4 (red) and integrin  $\beta 4$  (Green). Bar denotes 50 $\mu$ m.

(b) Keratinocytes were transfected with the 5kb *Tcf4* promoter-Firefly luciferase and *Renilla* luciferase constructs, together with constructs expressing either Stat3, constitutively active Stat3 (Stat3C) or control vector. Luciferase activity was measured and Firefly luciferase activity was normalized over *Renilla* luciferase activity. Graph shows normalized luciferase activity relative to vector control. Experiments were repeated three times. Data are mean  $\pm$  s.d.

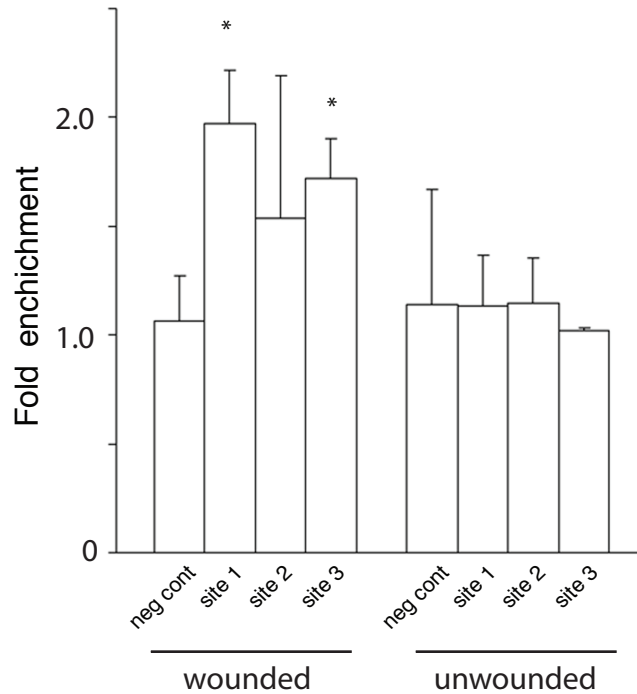

**Supplementary Figure 7. Endogenous Stat3 binds to the *Tcf3* promoter in wounded skins.**

Chromatin immunoprecipitation (ChIP) was performed with anti-Stat3 or isotype control antibodies on crosslinked chromatin lysates from wounded skins or adjacent unwounded skins. Amount of chromatin precipitated by Stat3 or IgG was measured by qPCR using primers spanning regions containing Stat3 binding sites (sites 1-3) or regions without Stat3 conserved binding sites (neg cont). The graph shows the amount of fold enrichment of Stat3-immunoprecipitated DNA relative to IgG-immunoprecipitated DNA. Experiments were repeated three times. Data are mean  $\pm$  s.d. \* $p < 0.05$  (Student's *t* test).

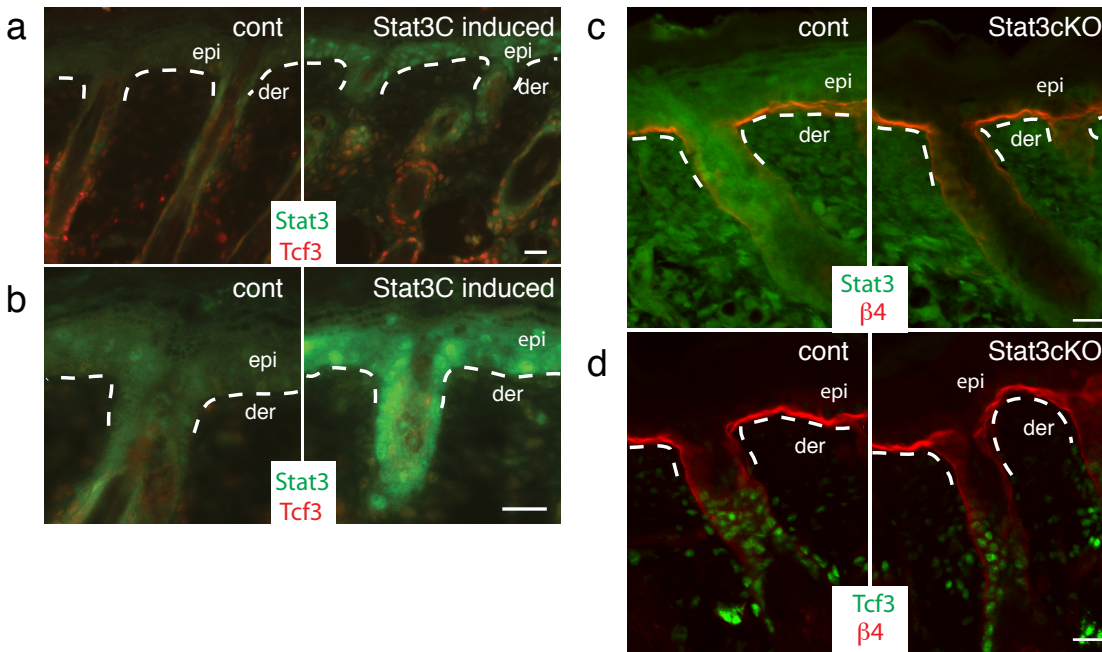

**Supplementary Figure 8. Stat3 overexpression or ablation does not affect Tcf3 expression during normal development.**

(a-b) Immunofluorescence images of P4 skin sections from *K14-rtTA* (cont) or *K14-rtTA;TRE-Stat3C* (*Stat3C* induced) mice that had been on Dox for 4 days. Skins were immunostained with antibodies specific to Stat3 (green) and Tcf3 (red).

(c-d) Immunofluorescence images of new born skin sections from *Stat3<sup>fl/fl</sup>* (cont) or *Stat3<sup>fl/fl</sup>;K14-Cre* (*Stat3* cKO) mice that were immunostained with antibodies specific to (c) Stat3 (green) (D)Tcf3 (green) and integrin  $\beta$ 4 (red). Bar denotes 20 $\mu$ m.



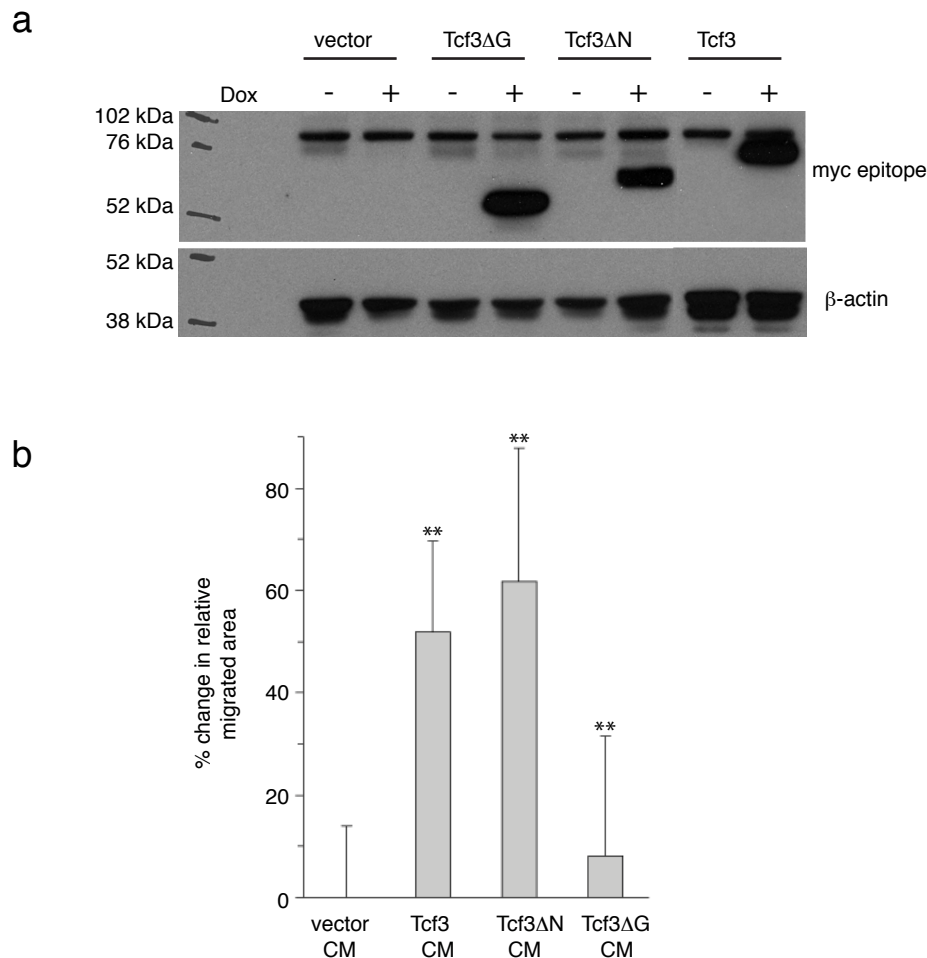

**Supplementary Figure 9. Tcf3 promotes cell migration non-cell autonomously and independently of  $\beta$ -catenin.**

(a) Keratinocytes were transduced with GFP-tagged lentiviral vectors expressing tet-inducible myc-tagged Tcf3 and its mutant versions Tcf3ΔN and Tcf3ΔG. After the transduced cells were enriched by fluorescent cell sorting, they were treated with Dox or vehicle control for 24 hours and harvested at the initiation of the migration assay. Western blot analysis detected Tcf3 and its mutant versions with antibodies against myc epitope only in cells treated with Dox.

(b) Migration assay was performed on wild-type keratinocytes that were incubated with conditioned media from transduced cells expressing tet-inducible Tcf3 and its mutant versions Tcf3ΔN, Tcf3ΔG. Graph quantifying the migrated area of wild-type cells that were incubated with Dox treated conditioned media during the migration assay relative to the area migrated by cells treated with vehicle treated conditioned media. Experiments were repeated twice. Data are mean  $\pm$  s.d. \*\* $p < 0.001$  (Student's *t* test).

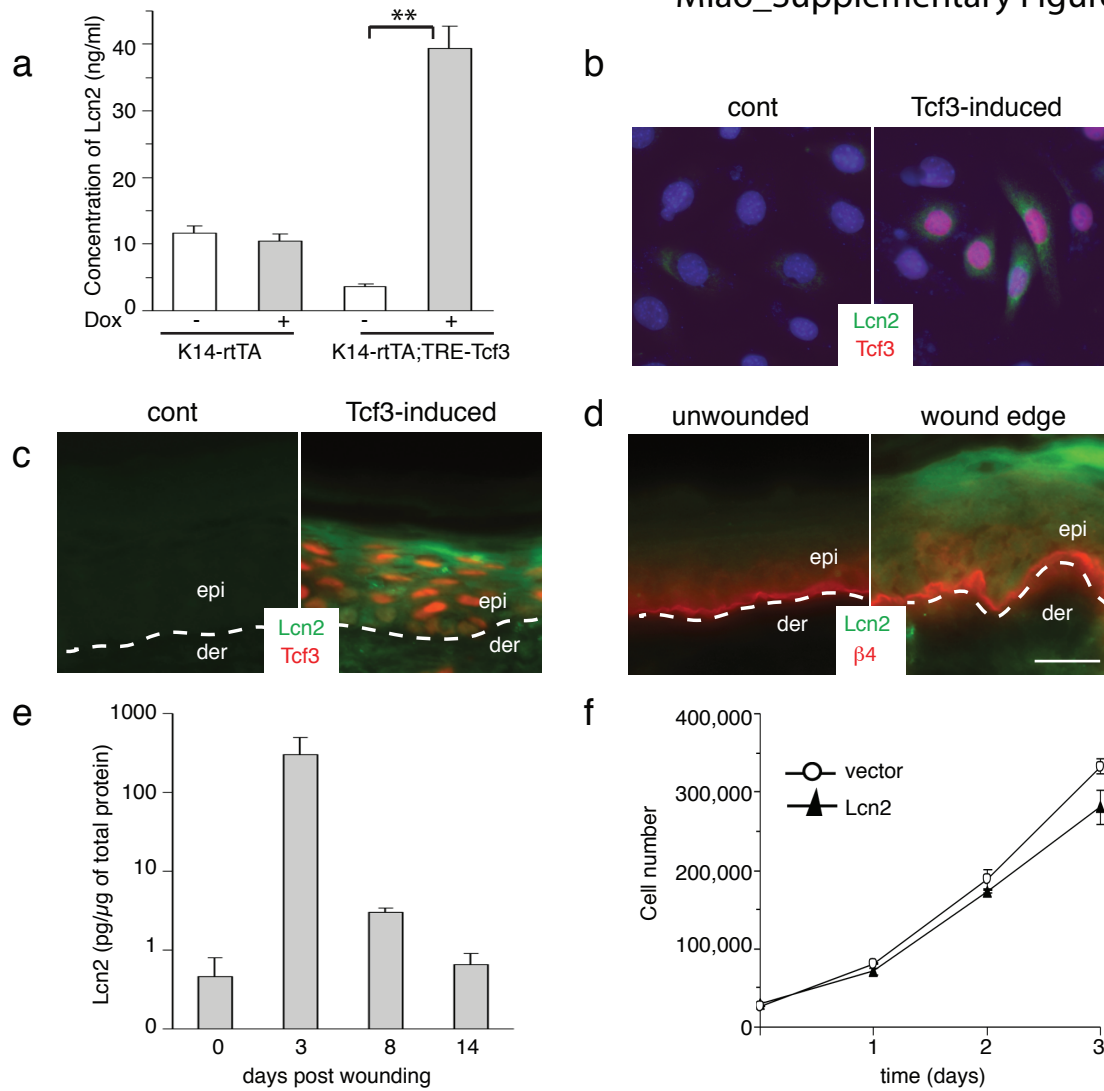

### Supplementary Figure 10. Lcn2 is induced in response to Tcf3 overexpression and wounding.

(a) Keratinocytes from tet-inducible Tcf3 (*K14-rtTA;TRE-Tcf3*) and control (*K14-rtTA*) mice were cultured in the presence or absence of Dox for 48 hours and their CM were collected. Lcn2 levels in the CM were determined by ELISA with the Lcn2 quantikine kit (R&D Systems). Experiments were repeated twice. Data are mean  $\pm$  s.d. \*\* $p < 0.001$  (Student's *t* test).

(b) Immunofluorescence images of keratinocytes expressing tet-inducible myc-tagged Tcf3. Keratinocytes from tet-inducible Tcf3 (*K14-rtTA;TRE-Tcf3*) or control (*K14-rtTA*) mice and were grown in media containing Dox for 24 hours prior to being fixed and immunostained for myc-tagged Tcf3 (red) and Lcn2 (green).

(c) Immunofluorescence images of skins of tet-inducible Tcf3 (*K14-rtTA;TRE-Tcf3*) or control (*K14-rtTA*) P5 mice that had been injected with Dox (100  $\mu$ l, 1 mg/ml in PBS) for 48 hours. Skins were embedded in OCT and immunostained with antibodies specific to Lcn2 (green) and Tcf3 (red).

(d) Immunofluorescence analysis of the skin wound edge of wild-type mice using antibodies against integrin  $\beta 4$  (red) and Lcn2 (green). Full thickness wounds were created on dorsal skins of 10-week old mice and isolated 5 days post wounding. Unwounded skins from the same mice were used as controls. Bar denotes 20 $\mu$ m.

(e) Lcn2 levels in the total protein lysates isolated from the wound edge were determined by ELISA with the Lcn2 quantikine kit (R&D Systems). Experiments were repeated twice. Data are mean  $\pm$  s.d.

(f) Keratinocytes were transduced with retroviral vectors *pBabe* or *pBabe-Lcn2* and the transduced cells were selected with puromycin before being plated for proliferation assay. Experiments were repeated three times. Data are mean  $\pm$  s.d.

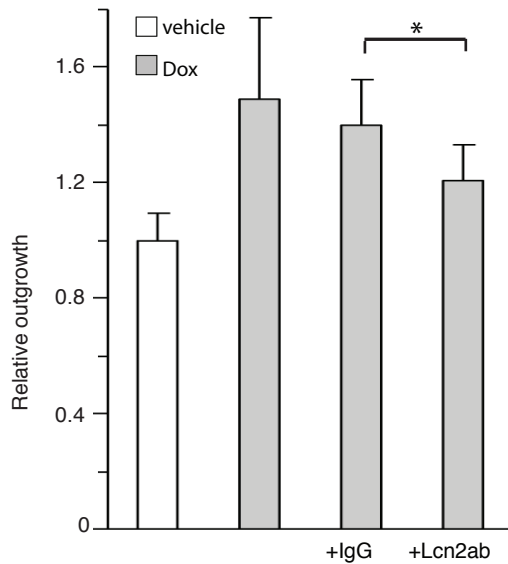

**Supplementary Figure 11. Inhibition of Lcn2 decreases the ability of epithelial cells from Tcf3-induced skin to migrate.**

Graph quantifying the relative distance of outgrowth of epithelial cells from skin explants from tet-inducible Tcf3 mice (*K14-rtTA;TRE-Tcf3*) that were treated with vehicle or Dox with the addition of anti- Lcn2 antibody or IgG isotype control. 4-mm dorsal skin punches were cultured in the presence or absence of Dox. Explants were treated with Mitomycin C treatment on day 3, followed by the incubation with anti- Lcn2 antibody or IgG isotype control. Explants from a minimum of 4 mice were analyzed for each condition 8 days after plating. Data are mean  $\pm$  s.d. \* $p < 0.05$  (Student's *t* test).

a

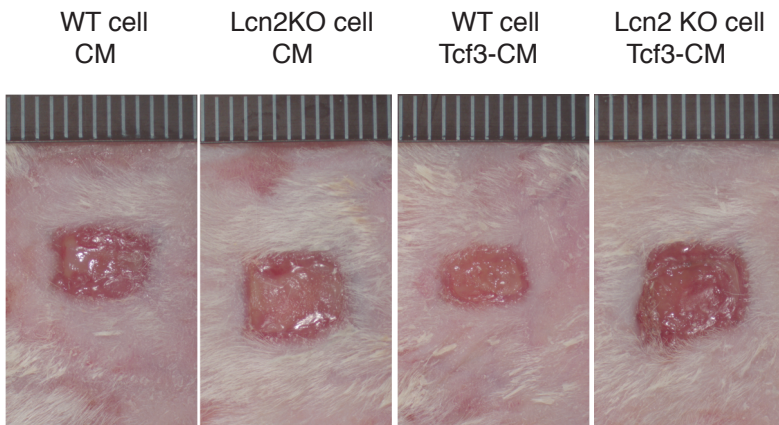

b

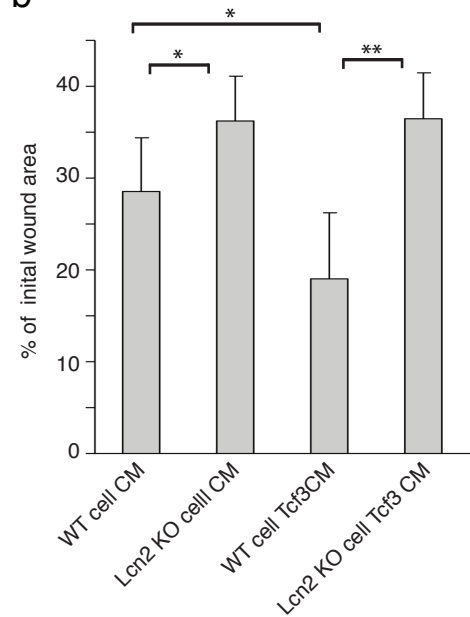

**Supplementary Figure 12. Ablation of Lcn2 decreases the ability of Tcf3-CM to promote wound healing.**

(a) Images of the wound sites were taken 10 days post wounding. 1cm<sup>2</sup> full-thickness wounds were created on dorsal skins of *ICR* mice and were treated every other day for 10 days with topical application of conditioned media collected from WT cells overexpressing Tcf3 (WT cell Tcf3-CM) or empty vector (WT cell CM), or Lcn2 KO cells overexpressing Tcf3 (Lcn2 KO cell Tcf3-CM) or empty vector (Lcn2 KO cell CM). Surface areas of the wounds were measured at the initial time point and 10 days post wounding.

(b) Graph quantifying the surface areas of the wounds as a percentage of the original wounds 10 days post wounding, WT cells overexpressing Tcf3 (WT cell Tcf3-CM) (n=6) or empty vector (WT cell CM) (n=7), or Lcn2 KO cells overexpressing Tcf3 (Lcn2 KO cell Tcf3-CM) (n=8) or empty vector (Lcn2 KO cell CM) (n=7). Data are mean ± s.d. \*p<0.05, \*\*p<0.001 (Student's *t* test).



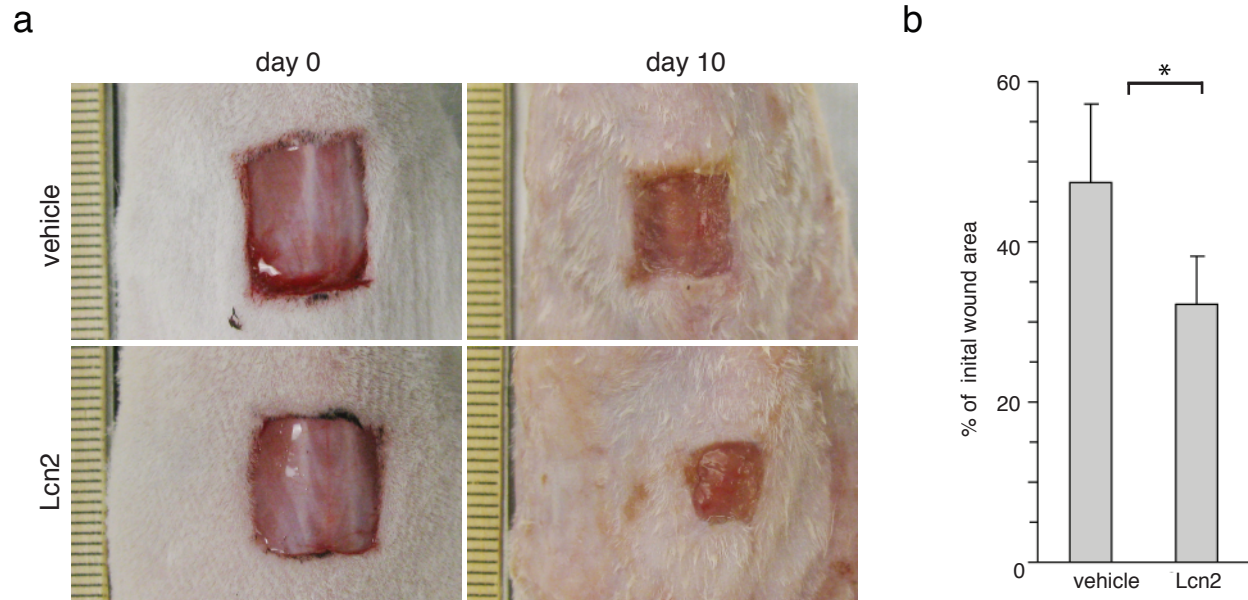

**Supplementary Figure 13. Lcn2 accelerates wound closure.**

(a) Images of skin wound sites taken immediately after wounding and 10 days post wounding show that topical application of recombinant Lcn2 accelerates wound healing. 1cm<sup>2</sup> full-thickness wounds were created on dorsal skins of wild-type mice and were treated daily with topical application of recombinant Lcn2 (200ng) or vehicle control. Surface areas of the wounds were measured at the initial time point and 10 days post wounding.

(b) Graph quantifying the effect of topical application of recombinant Lcn2 protein on wound closure (n=6 for each condition). Average surface areas of the wounds 10 days post wounding is quantified as a percentage of the initial wound areas. Areas of the wounds were measured with ImageJ software. Data are mean  $\pm$  s.d. \*p<0.05 (Student's *t* test).

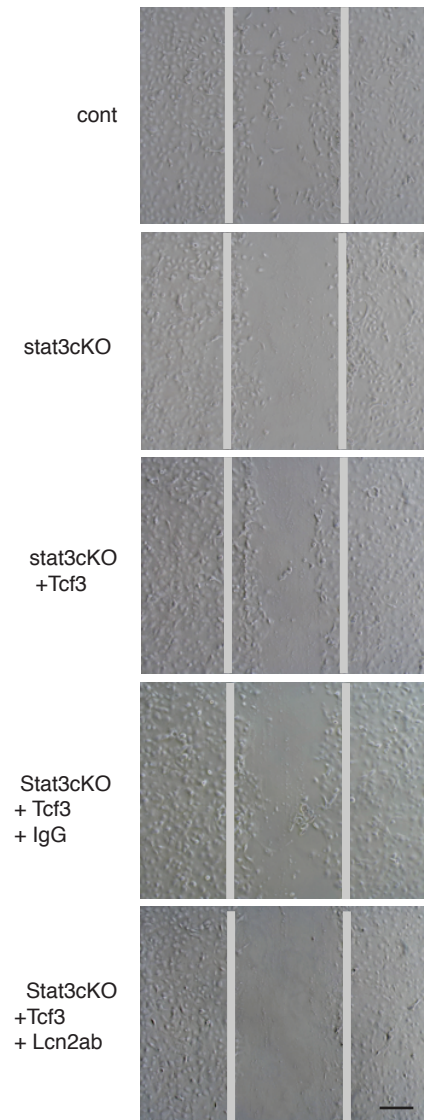

**Supplementary Figure 14. Inhibition of Lcn2 decreases the ability of Tcf3 to rescue defective migration in Stat3-deficient keratinocytes.**

Images of keratinocytes 48hrs after initiation of the migration assay. Migration assays were performed on *Stat3<sup>+/fl</sup>;K14-cre* (cont) or *Stat3<sup>fl/fl</sup>;K14-cre* (*Stat3* cKO) keratinocytes that were transduced with control or tet-inducible Tcf3 treated with Dox together with anti-Lcn2 antibody or IgG isotype control. Black bar denotes 200μm.

Miao Supplementary Table 1

## Primers for real-time PCR

|        | Forward                 | Reverse                |
|--------|-------------------------|------------------------|
| Mrpl19 | ACCCCTATGCCAGTGGAAA     | TCAAAGCAAATCTCCACACCT  |
| Tef3   | CGGGACAACACTATGGGAAGAAG | CCTCTTGGATTGCTGCTGA    |
| Tef4   | CACTCCACAGCTCAAAGCATC   | CACCACCTTCGCTCTCATCT   |
| Lef1   | GCACGTGAAGCCTCAACAC     | TAGCGTGCACCTCAGCTACGA  |
| Tef1   | CGCGGGATAACTACGAAAG     | AGAGCACTGTCATCGGAAGG   |
| Len2   | CCCTGTATGGAAGAACCAAGGA  | CACACTCACCACCCATTTCAGT |

## Primers for ChIP-qPCR

|           |                       | Spanning regions, relative to TSS |
|-----------|-----------------------|-----------------------------------|
| mTef3-1U  | GAGTCCTAGGTTCCGTGCTG  | -223 to -112                      |
| mTef3-1L  | GGCGACAAAGTTTTGACAGG  |                                   |
| mTef3-2U  | GCGGGCCAGACTCTTAGA    | -579 to -468                      |
| mTef3-2L  | CCTCCTCGTGGACCA       |                                   |
| mTef3-3U  | TGTGCTCGGCGGATCT      | -715 to -575                      |
| mTef3-3L  | CCCGCACTCCTTCACAT     |                                   |
| mTef3NC-U | GGGACCATACTCCTGTAGGTT | -6035 to -5930                    |
| mTef3NC-L | CCGAGGGGTCTTTTCATATAC |                                   |

## Primers for Cloning Lef/Tef genes

|                  |                                                                              |
|------------------|------------------------------------------------------------------------------|
| myctag EcoRI fw  | CTAGAATTCGCCACCATGGCATCAATGCAGAAGCTGATCTC                                    |
| Tef3 XhoI rv     | CCTCTCGAGTTAGTGGGCAGACTTGGTGACCAAG                                           |
| Tef3dC XhoI rv2  | CTTCTCGAGTTA CGCTTGCTCGGAGTGGGTAGC                                           |
| mTef1 myc Eco fw | ATCCAGGAATTCGCCACCATGGAGCAGAAGCTGATCAGCGAGGAGGACCTGATGTACAAAGAGACTGTCTACTCTG |
| mTef1 NotI rv    | ACGGATGCGGCCGCCTAGAGCACTGTCTATCGGAAG                                         |

## Primers for cloning promoters

|                  |                                   |
|------------------|-----------------------------------|
| mTef3 MluI fw    | CTCACGCGTATCACAGCAATCAAGACGCTA    |
| mTef3 XhoI rv    | TAGCTCGAGGTTGGGGCCACGGGCCGGGGC    |
| mTef4 SacI fw    | CCGAGCTCCCAAGCCCAGGTGTCTATTCT     |
| mTef4 HindIII rv | GCGAAGCTTTTACCCACCAGCAGCAGCAATTTG |

## Primers for mutating Stat3 binding sites in Tef3 promoter

|                 |                                      |
|-----------------|--------------------------------------|
| Tef3mStat3-1 s  | GGTGCTGGGCCCCGAATCCACAGAGCCACGC      |
| Tef3mStat3-1 as | GCGTGGCTCTGTGGATTGCGGGCCACGC         |
| Tef3mStat3-2 s  | AGGGTGCAGAGAAAGACCACAGGGTAGCCATGGAG  |
| Tef3mStat3-2 as | CTCCATGGCTACCCTGGTGGTCCCTTTCTCGCACCT |
| Tef3mStat3-3 s  | GGTGGGAGCGGAGTGGTCCACCGCGGAGTCTGG    |
| Tef3mStat3-3 as | CCAGAACTCCGCGGGTGGACCACTCCGCTCCACC   |

## Primers for cloning Len2

|              |                                    |
|--------------|------------------------------------|
| Len2 XhoI fw | att ctcgag ACCATGGCCCTGAGTGTTCATGT |
| Len2 SfuI rv | atc ttcgaa GTTGTCATGCATTGGTCCG     |
